# Supplementary material for: Intragenic Duplication of DMRT1 in a SRY-Negative Boy with 46,XX Disorder of Sex Development
Source: Preprints.org preprint supplement (doi:10.20944/preprints202112.0219.v1), 2021-12-14
Supplement: Supplementary file 3 [file supplementary]

Supplementary Table SI. Genes analyzed by a custom CGH-array (left) and by NGS panel (right)

| SRY | SRY |
| --- | --- |
| SOX9 | SOX9 |
| FGF9 |  |
| FGFR2 |  |
| PGD2 |  |
| NR5A1 | NR5A1 |
| NR0B1 | NR0B1 |
| GATA4 |  |
| ZFPM2 |  |
| DMRT1 |  |
| DMRT2 |  |
| WWOX |  |
| MAP3K1 | MAP3K1 |
| MAMLD1 | MAMLD1 |
| DHH | DHH |
| HHAT |  |
| CBX2 | CBX2 |
| WT1 | WT1 |
| RSPO1 |  |
| WNT4 |  |
| CTNNB1 |  |
| BMP15 | BMP15 |
| FOXL2 |  |
| SOX3 |  |
| SOX10 |  |
| AMH | AMH |
| AMHR2 | AMHR2 |
| AR | AR |
| STAR | STAR |
| HSD17B3 | HSD17B3 |
| CYP17A1 | CYP17A1 |
| HSD3B2 | HSD3B2 |
| POR | POR |
| CYP11B1 | CYP11B1 |
| CYP11A1 |  |
| CYP21A2 |  |
| SRD5A2 | SRD5A2 |
| AKR1C4 |  |
| AKR1C2 |  |
| LHCGR |  |
| ZFPM2 |  |
| CY19A1 |  |
